# Supplementary material for: Promising ITO-free perovskite solar cells with WO3–Ag–SnO2as transparent conductive oxide
Source: Royal Society of Chemistry journal article supplement (doi:10.1039/c8ta08287a), 2018-01-01
Supplement: c8ta08287a1.pdf [file c8ta08287a1.pdf]

## Supporting Information

### Promising ITO-free Perovskite Solar Cells with WO<sub>3</sub>-Ag-SnO<sub>2</sub> as Transparent Conductive Oxide

Fengxia Liang,<sup>a †</sup> Yi Lin,<sup>a,b †</sup> Zhengfei He,<sup>c</sup> Wei Chen,<sup>b</sup> Yudong Zhu,<sup>b</sup> Tian Chen,<sup>b</sup> Lin Liang,<sup>a</sup> Suman Ma,<sup>c</sup> Yinghui Wu,<sup>b</sup> Bao Tu,<sup>b</sup> Dong Wang,<sup>b</sup> Zhixiang Zhang,<sup>d</sup> Linbao Luo,<sup>d\*</sup> and Zhubing He<sup>b\*</sup>

<sup>a</sup> School of Materials Science and Engineering, Anhui Provincial Key Laboratory of Advanced Functional Materials and Devices, Hefei University of Technology, Hefei, Anhui, 230009, China

<sup>b</sup> Department of Materials Science and Engineering, Shenzhen Key Laboratory of Full Spectral Solar Electricity Generation (FSSEG), Southern University of Science and Technology, No. 1088, Xueyuan Rd., Shenzhen, 518055, Guangdong, China.

<sup>c</sup> Department of Electrical and Electronic Engineering, Southern University of Science and Technology, No. 1088, Xueyuan Rd., Shenzhen, 518055, Guangdong, China.

<sup>d</sup> School of Electronic Science and Applied Physics, Hefei University of Technology, Hefei, Anhui, 230009, China

\*E-mail: [hezhang@hfut.edu.cn](mailto:hezhang@hfut.edu.cn); [luolb@sustc.edu.cn](mailto:luolb@sustc.edu.cn)

† Both authors contribute equally to this paper.

Figure S1

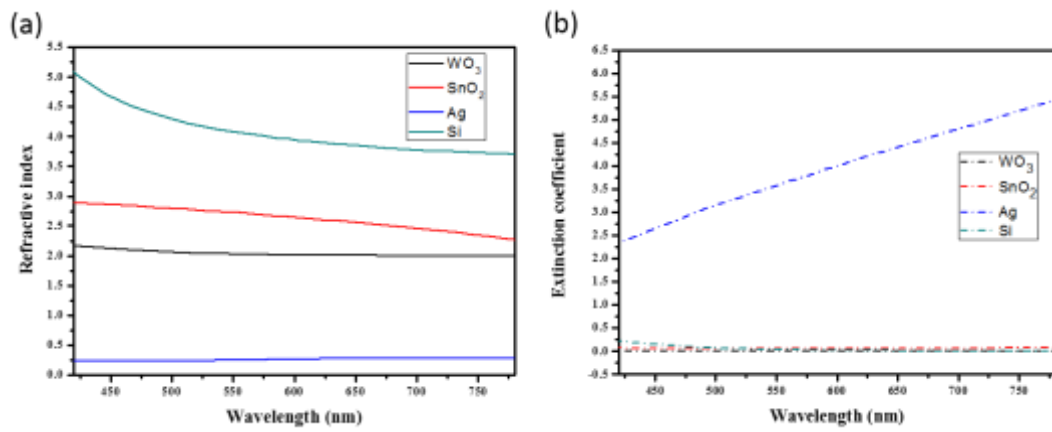

**Figure S1.** (a) Refractive indexes and (b) extinction coefficients of  $\text{WO}_3$ ,  $\text{SnO}_2$ , Ag and Si used in the FDTD solution simulation.

Figure S2

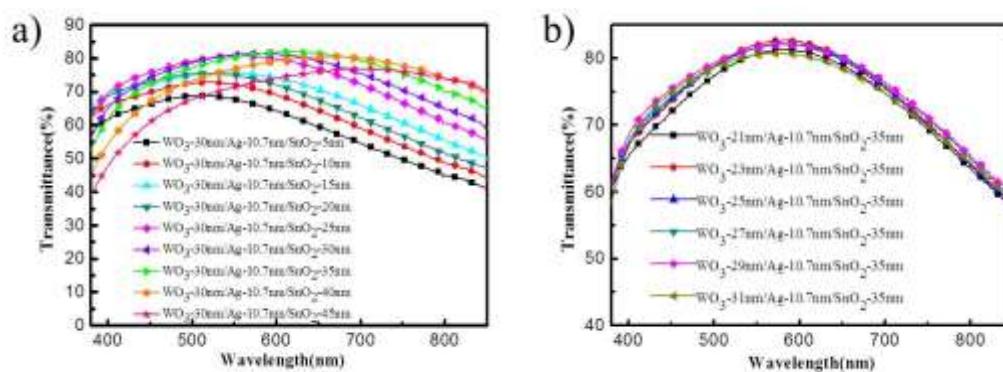

**Figure S2.** Transmission spectra of WO<sub>3</sub> (30nm)/Ag (10.7nm)/SnO<sub>2</sub> (x nm) with varying thicknesses of SnO<sub>2</sub> layer (a), and of WO<sub>3</sub> (x nm)/Ag (10.7nm)/SnO<sub>2</sub> (35 nm) with varying thicknesses of WO<sub>3</sub> layer (b).

Figure S3

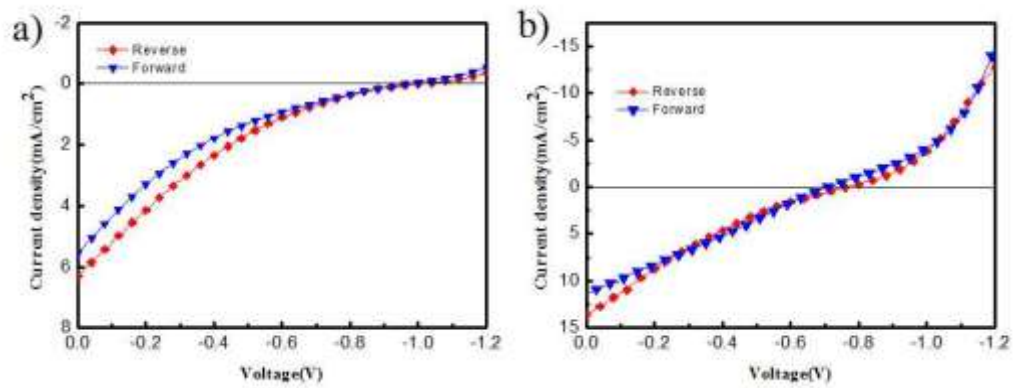

**Figure S3.** J-V curves of a typical device with the WO<sub>3</sub> (23nm)/Ag (10.7nm)/SnO<sub>2</sub> (35nm) as the transparent electrode (without SnO<sub>2</sub> NPs) (a) and with ITO as the transparent electrode (without SnO<sub>2</sub> NPs) (b).

Figure S4

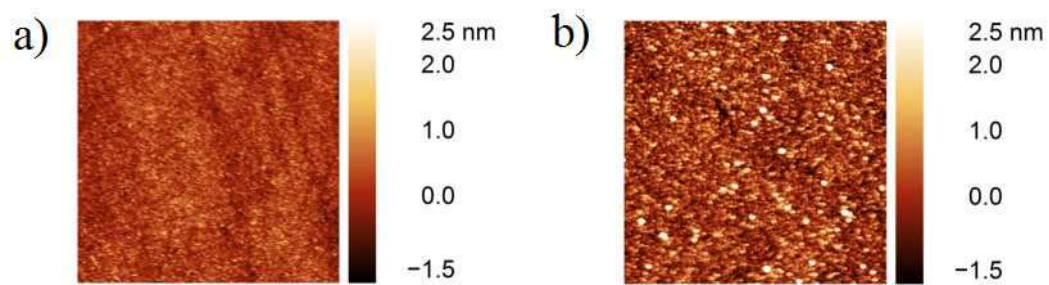

**Figure S4.** AFM topographic images of the WAS and WAS/SnO<sub>2</sub> NPs, respectively.

The scan size is  $5\mu\text{m} \times 5\mu\text{m}$ .

Figure S5

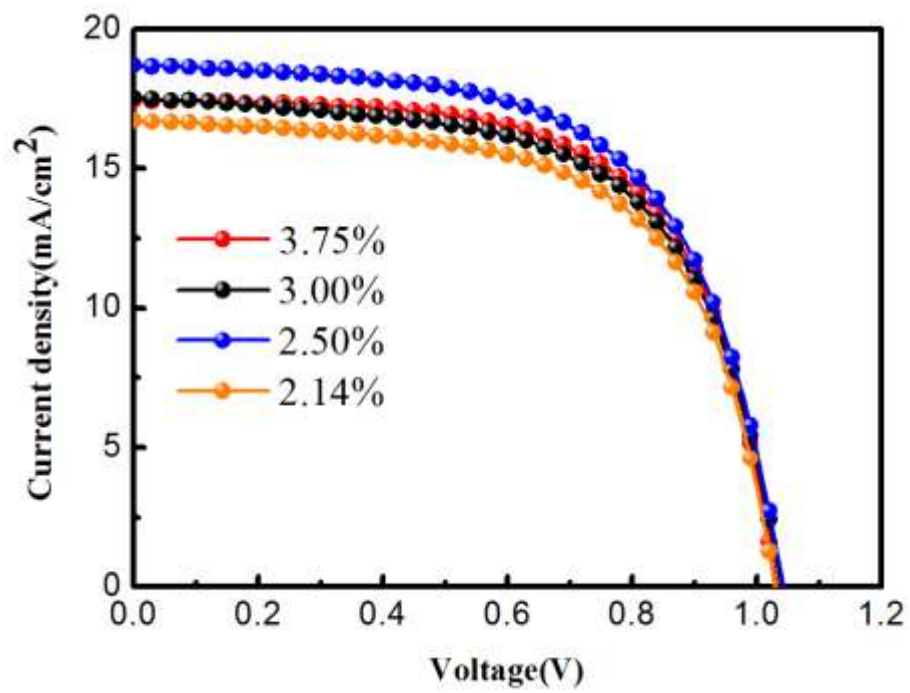

**Figure S5.** J-V curves of the devices with the SnO<sub>2</sub> NPs interlayer deposited by different concentrations (mass fraction) of the 7nm SnO<sub>2</sub> NPs precursor solution.

Figure S6

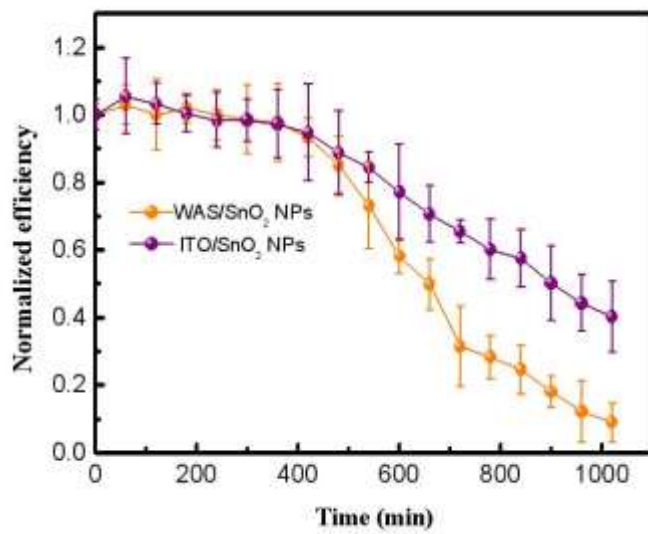

**Figure S6** . Stability of the unpackaged perovskite solar cells with the WAS and ITO as bottom electrodes under ambient atmosphere (37%RH and 25°C) under the illumination of AM 1.5 G simulated sunlight. There are 6 devices for each kind of devices.

Tables

**Table S1.** Summary of photovoltaic parameters of the WAS based PSCs with a SnO<sub>2</sub> NPs interfacial layer. The device aperture area is 0.1cm<sup>2</sup>.

| <i>Small Devices</i>     | <i>Scandirection</i> | <i>Jsc(mA/cm<sup>2</sup>)</i> | <i>Jsc by EQE(mA/cm<sup>2</sup>)</i> | <i>Voc(V)</i>           | <i>FF(%)</i>       | <i>PCE(%)</i>        |
|--------------------------|----------------------|-------------------------------|--------------------------------------|-------------------------|--------------------|----------------------|
| WAS/SnO <sub>2</sub> NPs | Reverse              | 18.30 ± 0.3<br>(18.6)         | 18.13                                | 1.045 ± 0.03<br>(1.045) | 69.3 ± 2.7<br>(72) | 13.2 ± 0.7<br>(14.0) |
|                          | Forward              | 18.4                          |                                      | 1.028                   | 69                 | 13.1                 |

**Table S2.** Summary of the PL lifetime parameters from fitting curves of the TRPL decay spectra of three kinds of samples below.

| <i>Samples</i>                      | <i>τ<sub>1</sub>(ns)</i> | <i>A<sub>1</sub>(%)</i> | <i>τ<sub>2</sub>(ns)</i> | <i>A<sub>2</sub>(%)</i> | <i>Weighted average (ns)</i> |
|-------------------------------------|--------------------------|-------------------------|--------------------------|-------------------------|------------------------------|
| Glass/Perovskite                    | 9.75                     | 0.41                    | 146.27                   | 99.59                   | 146.22                       |
| WAS/Perovskite                      | 9.45                     | 3.39                    | 70.88                    | 96.61                   | 70.59                        |
| WAS/SnO <sub>2</sub> NPs/Perovskite | 4.15                     | 17.07                   | 37.87                    | 82.93                   | 37.13                        |
